# Supplementary material for: Synaptic plasticity and learning behaviour in multilevel memristive devices
Source: Royal Society of Chemistry journal article supplement (doi:10.1039/d3ra02075d), 2023-01-01
Supplement: d3ra02075d1.pdf [file d3ra02075d1.pdf]

## Supplementary Information

### **Synaptic plasticity and learning behaviour in multilevel memristive device**

M. Asif<sup>1,2</sup>, Yogesh Singh<sup>1,2</sup>, Atul Thakre<sup>3</sup>, V.N. Singh<sup>1,2</sup>, Ashok Kumar<sup>1,2</sup>\*

<sup>1</sup>CSIR-National Physical Laboratory, Dr. K.S. Krishnan Marg, New Delhi-110012, India.

<sup>2</sup>Academy of Scientific and Innovative Research (AcSIR), Ghaziabad-201002, India.

<sup>3</sup>Centre for Functional Materials, Vellore Institute of Technology, Vellore 632014, Tamilnadu, India

\*Email- Dr. Ashok Kumar ([ashok553@nplindia.org](mailto:ashok553@nplindia.org))

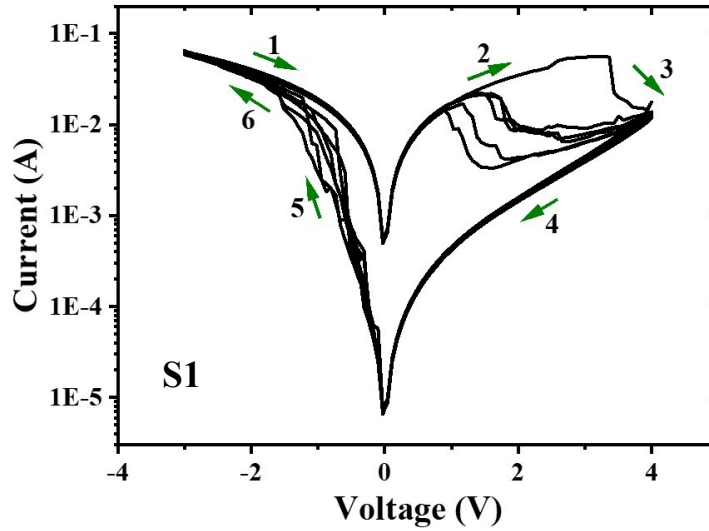

**Figure S1:** I-V Characteristics by sweeping the voltage from -3V to 0V to 4V for SET operation and 4V to 0V to -3V for RESET operation.  $V_{\text{RESET}}$  have a wide voltage window but  $V_{\text{SET}}$  shows the good reproducibility.

Here we sweep the voltage from -3V to 0V to 4V and the 4V to 0V to -3V to switch the device from LRS to HRS and HRS to LRS, respectively. Some of the device was switched easily in the low voltage regime but it was created the problem in the repeatability of RESET voltage (LRS to HRS) as shown in above figure. During SET voltage (HRS to LRS), device was switched easily with the repeatable way. Due to these limitations, we tried to improve it by sweeping the voltage from -3.5V to 0V to 4.5V and 4.5V to 0V to -3.5V as we mentioned in the main manuscript and we obtained the better repeatable results.

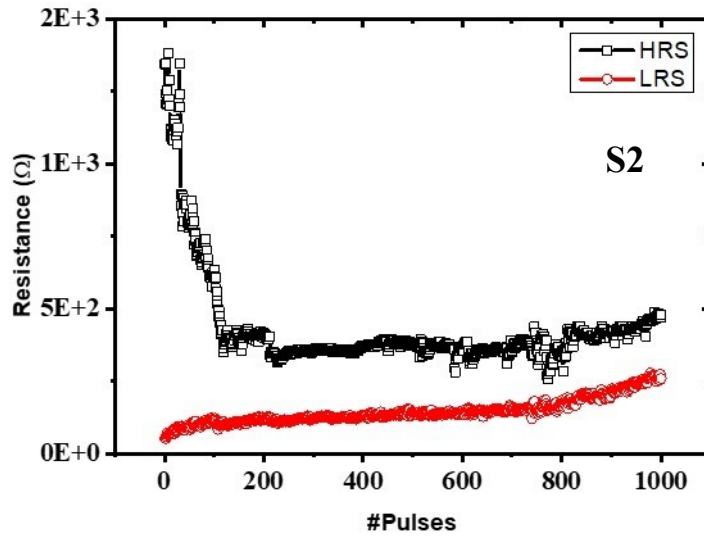

**Figure S2:** Endurance cycle in a linear scale by applying  $10^3$  write and read pulse cycles. Initially the HRS decays rapidly and then approaching towards the stable state.

Figure S2 is similar to the inset of figure 3(c) of the main manuscript. It is maintaining the same ratio between two resistance states (HRS and LRS) as we mentioned in the main manuscript.
